# Supplementary material
Source: publisher site journal article supplement (https://www.dovepress.com/article/566145)
Supplement: Supplementary file 1 [file 566145_Supplementary%20documents-R1.docx]

Table S1 PISMA-NHA checklist

|  | **Item #** | **Checklist Item** | **Reported on Page #** |
| --- | --- | --- | --- |
| **TITLE** |  |  |  |
| Title | 1 | Identify the report as a systematic review *incorporating a network meta-analysis (or related form of meta-analysis).* | **Page 1**  **Line1-2** |
|  |  |  |  |
| **ABSTRACT** |  |  |  |
| Structured summary | 2 | Provide a structured summary including, as applicable:  **Background:** main objectives  **Methods:** data sources; study eligibility criteria, participants, and interventions; study appraisal; and *synthesis methods, such as network meta-analysis.*  **Results:** number of studies and participants identified; summary estimates with corresponding confidence/credible intervals; *treatment rankings may also be discussed. Authors may choose to summarize pairwise comparisons against a chosen treatment included in their analyses for brevity.*  **Discussion/Conclusions:** limitations; conclusions and implications of findings.  **Other:** primary source of funding; systematic review registration number with registry name. | **Page 1-3**  **Line17-45** |
|  |  |  |  |
| **INTRODUCTION** |  |  |  |
| Rationale | 3 | Describe the rationale for the review in the context of what is already known*, including mention of why a network meta-analysis has been conducted.* | **Page 3-5**  **Line48-90** |
| Objectives | 4 | Provide an explicit statement of questions being addressed, with reference to participants, interventions, comparisons, outcomes, and study design (PICOS). | **Page 5**  **Line91-95** |
|  |  |  |  |
| **METHODS** |  |  |  |
| Protocol and registration | 5 | Indicate whether a review protocol exists and if and where it can be accessed (e.g., Web address); and, if available, provide registration information, including registration number. | **Page 5**  **Line101-103** |
| Eligibility criteria | 6 | Specify study characteristics (e.g., PICOS, length of follow-up) and report characteristics (e.g., years considered, language, publication status) used as criteria for eligibility, giving rationale. *Clearly describe eligible treatments included in the treatment network, and note whether any have been clustered or merged into the same node (with justification).* | **Page 6-7**  **Line117-128** |
| Information sources | 7 | Describe all information sources (e.g., databases with dates of coverage, contact with study authors to identify additional studies) in the search and date last searched. | **Page 5-6**  **Line104-115** |
| Search | 8 | Present full electronic search strategy for at least one database, including any limits used, such that it could be repeated. | **Page 5-6**  **Line104-115** |
| Study selection | 9 | State the process for selecting studies (i.e., screening, eligibility, included in systematic review, and, if applicable, included in the meta-analysis). | **Page 5-6,20**  **Line104-115,488** |
| Data collection process | 10 | Describe method of data extraction from reports (e.g., piloted forms, independently, in duplicate) and any processes for obtaining and confirming data from investigators. | **Page 7-8**  **Line144-153** |
| Data items | 11 | List and define all variables for which data were sought (e.g., PICOS, funding sources) and any assumptions and simplifications made. | **Page 6-7**  **Line120-128** |
| **Geometry of the network** | **S1** | Describe methods used to explore the geometry of the treatment network under study and potential biases related to it. This should include how the evidence base has been graphically summarized for presentation, and what characteristics were compiled and used to describe the evidence base to readers. | **Page 8**  **Line154-168** |
| Risk of bias within individual studies | 12 | Describe methods used for assessing risk of bias of individual studies (including specification of whether this was done at the study or outcome level), and how this information is to be used in any data synthesis. | **Page 7**  **Line134-143** |
| Summary measures | 13 | State the principal summary measures (e.g., risk ratio, difference in means). *Also describe the use of additional summary measures assessed, such as treatment rankings and surface under the cumulative ranking curve (SUCRA) values, as well as modified approaches used to present summary findings from meta-analyses.* | **Page 8**  **Line154-168** |
| Planned methods of analysis | 14 | Describe the methods of handling data and combining results of studies for each network meta-analysis. This should include, but not be limited to:   - *Handling of multi-arm trials;* - *Selection of variance structure;* - *Selection of prior distributions in Bayesian analyses; and* - *Assessment of model fit.* | **Page 8**  **Line154-168** |
| **Assessment of Inconsistency** | **S2** | Describe the statistical methods used to evaluate the agreement of direct and indirect evidence in the treatment network(s) studied. Describe efforts taken to address its presence when found. | **Page 8**  **Line154-168** |
| Risk of bias across studies | 15 | Specify any assessment of risk of bias that may affect the cumulative evidence (e.g., publication bias, selective reporting within studies). | **Page 8**  **Line154-168** |
| Additional analyses | 16 | Describe methods of additional analyses if done, indicating which were pre-specified. This may include, but not be limited to, the following:   - Sensitivity or subgroup analyses; - Meta-regression analyses; - *Alternative formulations of the treatment network; and* - *Use of alternative prior distributions for Bayesian analyses (if applicable).* | **Page 8**  **Line154-168** |
|  |  |  |  |
| **RESULTS†** |  |  |  |
| Study selection | 17 | Give numbers of studies screened, assessed for eligibility, and included in the review, with reasons for exclusions at each stage, ideally with a flow diagram. | **Page 9,20**  **Line170-179，479** |
| **Presentation of network structure** | **S3** | Provide a network graph of the included studies to enable visualization of the geometry of the treatment network. | **Page 20**  **Line480,481** |
| **Summary of network geometry** | **S4** | Provide a brief overview of characteristics of the treatment network. This may include commentary on the abundance of trials and randomized patients for the different interventions and pairwise comparisons in the network, gaps of evidence in the treatment network, and potential biases reflected by the network structure. | **Page 10**  **Line196,200** |
| Study characteristics | 18 | For each study, present characteristics for which data were extracted (e.g., study size, PICOS, follow-up period) and provide the citations. | **Page 20**  **Line483,484** |
| Risk of bias within studies | 19 | Present data on risk of bias of each study and, if available, any outcome level assessment. | **Page 10**  **Line193,195** |
| Results of individual studies | 20 | For all outcomes considered (benefits or harms), present, for each study: 1) simple summary data for each intervention group, and 2) effect estimates and confidence intervals. *Modified approaches may be needed to deal with information from larger networks.* | **Page 10**  **Line201,209** |
| Synthesis of results | 21 | Present results of each meta-analysis done, including confidence/credible intervals. *In larger networks, authors may focus on comparisons versus a particular comparator (e.g. placebo or standard care), with full findings presented in an appendix. League tables and forest plots may be considered to summarize pairwise comparisons.* If additional summary measures were explored (such as treatment rankings), these should also be presented. | **Page 10，20**  **Line201,209,480-481** |
| **Exploration for inconsistency** | **S5** | Describe results from investigations of inconsistency. This may include such information as measures of model fit to compare consistency and inconsistency models, *P* values from statistical tests, or summary of inconsistency estimates from different parts of the treatment network. | **Page 10 ，20**  **Line199,200,492** |
| Risk of bias across studies | 22 | Present results of any assessment of risk of bias across studies for the evidence base being studied. | **Page 20**  **Line 491** |
| Results of additional analyses | 23 | Give results of additional analyses, if done (e.g., sensitivity or subgroup analyses, meta-regression analyses*, alternative network geometries studied, alternative choice of prior distributions for Bayesian analyses,* and so forth). | ***NA*** |
|  |  |  |  |
| **DISCUSSION** |  |  |  |
| Summary of evidence | 24 | Summarize the main findings, including the strength of evidence for each main outcome; consider their relevance to key groups (e.g., healthcare providers, users, and policy-makers). | **Page 11**  **Line 219-222** |
| Limitations | 25 | Discuss limitations at study and outcome level (e.g., risk of bias), and at review level (e.g., incomplete retrieval of identified research, reporting bias). *Comment on the validity of the assumptions, such as transitivity and consistency. Comment on any concerns regarding network geometry (e.g., avoidance of certain comparisons).* | **Page 11**  **Line 223-293** |
| Conclusions | 26 | Provide a general interpretation of the results in the context of other evidence, and implications for future research. | **Page 15**  **Line 295-304** |
|  |  |  |  |
| **FUNDING** |  |  |  |
| Funding | 27 | Describe sources of funding for the systematic review and other support (e.g., supply of data); role of funders for the systematic review. This should also include information regarding whether funding has been received from manufacturers of treatments in the network and/or whether some of the authors are content experts with professional conflicts of interest that could affect use of treatments in the network. | **Page 15**  **Line 307-309** |

Table S2 Search strategy for PubMed pubmed

| **Search number** | **Search Details** | **Results** | **Time** |
| --- | --- | --- | --- |
| 16 | (("pain management"[MeSH Major Topic] OR ("pain management"[Title/Abstract] OR "management pain"[Title/Abstract] OR (("manage"[All Fields] OR "managed"[All Fields] OR "management s"[All Fields] OR "Managements"[All Fields] OR "manager"[All Fields] OR "manager s"[All Fields] OR "managers"[All Fields] OR "manages"[All Fields] OR "managing"[All Fields] OR "managment"[All Fields] OR "organization and administration"[MeSH Terms] OR ("organization"[All Fields] AND "administration"[All Fields]) OR "organization and administration"[All Fields] OR "Management"[All Fields] OR "disease management"[MeSH Terms] OR ("disease"[All Fields] AND "Management"[All Fields]) OR "disease management"[All Fields]) AND "Pain"[Title/Abstract]) OR "pain managements"[Title/Abstract] OR "pain postoperative"[Title/Abstract] OR "postsurgical pain"[Title/Abstract] OR "pain postsurgical"[Title/Abstract] OR "post surgical pain"[Title/Abstract] OR "pain post surgical"[Title/Abstract] OR "post surgical pain"[Title/Abstract] OR "post operative pain"[Title/Abstract] OR "post operative pain"[Title/Abstract] OR "post operative pains"[Title/Abstract] OR "postoperative pain"[Title/Abstract] OR "pain post operative"[Title/Abstract] OR "pain post operative"[Title/Abstract] OR "postoperative pain acute"[Title/Abstract] OR "pain acute postoperative"[Title/Abstract] OR "post operative pain acute"[Title/Abstract] OR "pain acute post operative"[Title/Abstract] OR "post operative pain acute"[Title/Abstract] OR "acute postoperative pain"[Title/Abstract] OR "acute post operative pain"[Title/Abstract] OR "acute post operative pain"[Title/Abstract] OR "postoperative pain chronic"[Title/Abstract] OR "pain chronic postoperative"[Title/Abstract] OR "chronic postsurgical pain"[Title/Abstract] OR ((("Chronic"[All Fields] OR "chronical"[All Fields] OR "chronically"[All Fields] OR "chronicities"[All Fields] OR "chronicity"[All Fields] OR "chronicization"[All Fields] OR "chronics"[All Fields]) AND ("Postsurgical"[All Fields] OR "postsurgically"[All Fields])) AND "Pains"[Title/Abstract]) OR "pain chronic postsurgical"[Title/Abstract] OR "postsurgical pain chronic"[Title/Abstract] OR "persistent postsurgical pain"[Title/Abstract] OR "pain persistent postsurgical"[Title/Abstract] OR (("Postsurgical"[All Fields] OR "postsurgically"[All Fields]) AND "pain persistent"[Title/Abstract]) OR "chronic post operative pain"[Title/Abstract] OR "chronic post operative pain"[Title/Abstract] OR "post operative pain chronic"[Title/Abstract] OR "pain chronic post operative"[Title/Abstract] OR "post operative pain chronic"[Title/Abstract] OR "chronic postoperative pain"[Title/Abstract] OR "chronic post surgical pain"[Title/Abstract] OR "chronic post surgical pain"[Title/Abstract] OR "pain chronic post surgical"[Title/Abstract] OR "post surgical pain chronic"[Title/Abstract] OR "analgaesia"[Title/Abstract] OR "analgesia"[Title/Abstract] OR "pain relief"[Title/Abstract] OR "post operation pain"[Title/Abstract] OR "postoperation pain"[Title/Abstract] OR "postsurgery pain"[Title/Abstract] OR "post surgery pain"[Title/Abstract] OR ((("sequential"[All Fields] OR "sequentially"[All Fields] OR "sequentials"[All Fields]) AND ("analgetic"[All Fields] OR "analgetics"[All Fields])) AND "analgesia"[Title/Abstract]) OR "surgical analgesia"[Title/Abstract])) AND ("cholecystectomy laparoscopic"[Title/Abstract] OR (("Cholecystectomy"[MeSH Terms] OR "Cholecystectomy"[All Fields] OR "Cholecystectomies"[All Fields]) AND "Celioscopic"[Title/Abstract]) OR "celioscopic cholecystectomies"[Title/Abstract] OR "celioscopic cholecystectomy"[Title/Abstract] OR (("Cholecystectomy"[MeSH Terms] OR "Cholecystectomy"[All Fields] OR "Cholecystectomies"[All Fields]) AND "Celioscopic"[Title/Abstract]) OR "laparoscopic cholecystectomy"[Title/Abstract] OR "cholecystectomies laparoscopic"[Title/Abstract] OR "laparoscopic cholecystectomies"[Title/Abstract] OR "laparoscopic gallbladder resection"[Title/Abstract] OR "cholecystectomy, laparoscopic"[MeSH Major Topic])) AND ("randomized controlled trial"[Title/Abstract] OR "controlled clinical trial"[Title/Abstract] OR "randomized"[Title/Abstract] OR "randomised"[Title/Abstract]) AND (("cholecystectomy laparoscopic"[Title/Abstract] OR (("Cholecystectomy"[MeSH Terms] OR "Cholecystectomy"[All Fields] OR "Cholecystectomies"[All Fields]) AND "Celioscopic"[Title/Abstract]) OR "celioscopic cholecystectomies"[Title/Abstract] OR "celioscopic cholecystectomy"[Title/Abstract] OR (("Cholecystectomy"[MeSH Terms] OR "Cholecystectomy"[All Fields] OR "Cholecystectomies"[All Fields]) AND "Celioscopic"[Title/Abstract]) OR "laparoscopic cholecystectomy"[Title/Abstract] OR "cholecystectomies laparoscopic"[Title/Abstract] OR "laparoscopic cholecystectomies"[Title/Abstract] OR "laparoscopic gallbladder resection"[Title/Abstract] OR "cholecystectomy, laparoscopic"[MeSH Major Topic]) AND ("pain management"[MeSH Major Topic] OR ("pain management"[Title/Abstract] OR "management pain"[Title/Abstract] OR (("manage"[All Fields] OR "managed"[All Fields] OR "management s"[All Fields] OR "Managements"[All Fields] OR "manager"[All Fields] OR "manager s"[All Fields] OR "managers"[All Fields] OR "manages"[All Fields] OR "managing"[All Fields] OR "managment"[All Fields] OR "organization and administration"[MeSH Terms] OR ("organization"[All Fields] AND "administration"[All Fields]) OR "organization and administration"[All Fields] OR "Management"[All Fields] OR "disease management"[MeSH Terms] OR ("disease"[All Fields] AND "Management"[All Fields]) OR "disease management"[All Fields]) AND "Pain"[Title/Abstract]) OR "pain managements"[Title/Abstract] OR "pain postoperative"[Title/Abstract] OR "postsurgical pain"[Title/Abstract] OR "pain postsurgical"[Title/Abstract] OR "post surgical pain"[Title/Abstract] OR "pain post surgical"[Title/Abstract] OR "post surgical pain"[Title/Abstract] OR "post operative pain"[Title/Abstract] OR "post operative pain"[Title/Abstract] OR "post operative pains"[Title/Abstract] OR "postoperative pain"[Title/Abstract] OR "pain post operative"[Title/Abstract] OR "pain post operative"[Title/Abstract] OR "postoperative pain acute"[Title/Abstract] OR "pain acute postoperative"[Title/Abstract] OR "post operative pain acute"[Title/Abstract] OR "pain acute post operative"[Title/Abstract] OR "post operative pain acute"[Title/Abstract] OR "acute postoperative pain"[Title/Abstract] OR "acute post operative pain"[Title/Abstract] OR "acute post operative pain"[Title/Abstract] OR "postoperative pain chronic"[Title/Abstract] OR "pain chronic postoperative"[Title/Abstract] OR "chronic postsurgical pain"[Title/Abstract] OR ((("Chronic"[All Fields] OR "chronical"[All Fields] OR "chronically"[All Fields] OR "chronicities"[All Fields] OR "chronicity"[All Fields] OR "chronicization"[All Fields] OR "chronics"[All Fields]) AND ("Postsurgical"[All Fields] OR "postsurgically"[All Fields])) AND "Pains"[Title/Abstract]) OR "pain chronic postsurgical"[Title/Abstract] OR "postsurgical pain chronic"[Title/Abstract] OR "persistent postsurgical pain"[Title/Abstract] OR "pain persistent postsurgical"[Title/Abstract] OR (("Postsurgical"[All Fields] OR "postsurgically"[All Fields]) AND "pain persistent"[Title/Abstract]) OR "chronic post operative pain"[Title/Abstract] OR "chronic post operative pain"[Title/Abstract] OR "post operative pain chronic"[Title/Abstract] OR "pain chronic post operative"[Title/Abstract] OR "post operative pain chronic"[Title/Abstract] OR "chronic postoperative pain"[Title/Abstract] OR "chronic post surgical pain"[Title/Abstract] OR "chronic post surgical pain"[Title/Abstract] OR "pain chronic post surgical"[Title/Abstract] OR "post surgical pain chronic"[Title/Abstract] OR "analgaesia"[Title/Abstract] OR "analgesia"[Title/Abstract] OR "pain relief"[Title/Abstract] OR "post operation pain"[Title/Abstract] OR "postoperation pain"[Title/Abstract] OR "postsurgery pain"[Title/Abstract] OR "post surgery pain"[Title/Abstract] OR ((("sequential"[All Fields] OR "sequentially"[All Fields] OR "sequentials"[All Fields]) AND ("analgetic"[All Fields] OR "analgetics"[All Fields])) AND "analgesia"[Title/Abstract]) OR "surgical analgesia"[Title/Abstract]))) | 891 | 1:00:33 |
| 15 | ("cholecystectomy laparoscopic"[Title/Abstract] OR (("Cholecystectomy"[MeSH Terms] OR "Cholecystectomy"[All Fields] OR "Cholecystectomies"[All Fields]) AND "Celioscopic"[Title/Abstract]) OR "celioscopic cholecystectomies"[Title/Abstract] OR "celioscopic cholecystectomy"[Title/Abstract] OR (("Cholecystectomy"[MeSH Terms] OR "Cholecystectomy"[All Fields] OR "Cholecystectomies"[All Fields]) AND "Celioscopic"[Title/Abstract]) OR "laparoscopic cholecystectomy"[Title/Abstract] OR "cholecystectomies laparoscopic"[Title/Abstract] OR "laparoscopic cholecystectomies"[Title/Abstract] OR "laparoscopic gallbladder resection"[Title/Abstract] OR "cholecystectomy, laparoscopic"[MeSH Major Topic]) AND ("pain management"[MeSH Major Topic] OR ("pain management"[Title/Abstract] OR "management pain"[Title/Abstract] OR (("manage"[All Fields] OR "managed"[All Fields] OR "management s"[All Fields] OR "Managements"[All Fields] OR "manager"[All Fields] OR "manager s"[All Fields] OR "managers"[All Fields] OR "manages"[All Fields] OR "managing"[All Fields] OR "managment"[All Fields] OR "organization and administration"[MeSH Terms] OR ("organization"[All Fields] AND "administration"[All Fields]) OR "organization and administration"[All Fields] OR "Management"[All Fields] OR "disease management"[MeSH Terms] OR ("disease"[All Fields] AND "Management"[All Fields]) OR "disease management"[All Fields]) AND "Pain"[Title/Abstract]) OR "pain managements"[Title/Abstract] OR "pain postoperative"[Title/Abstract] OR "postsurgical pain"[Title/Abstract] OR "pain postsurgical"[Title/Abstract] OR "post surgical pain"[Title/Abstract] OR "pain post surgical"[Title/Abstract] OR "post surgical pain"[Title/Abstract] OR "post operative pain"[Title/Abstract] OR "post operative pain"[Title/Abstract] OR "post operative pains"[Title/Abstract] OR "postoperative pain"[Title/Abstract] OR "pain post operative"[Title/Abstract] OR "pain post operative"[Title/Abstract] OR "postoperative pain acute"[Title/Abstract] OR "pain acute postoperative"[Title/Abstract] OR "post operative pain acute"[Title/Abstract] OR "pain acute post operative"[Title/Abstract] OR "post operative pain acute"[Title/Abstract] OR "acute postoperative pain"[Title/Abstract] OR "acute post operative pain"[Title/Abstract] OR "acute post operative pain"[Title/Abstract] OR "postoperative pain chronic"[Title/Abstract] OR "pain chronic postoperative"[Title/Abstract] OR "chronic postsurgical pain"[Title/Abstract] OR ((("Chronic"[All Fields] OR "chronical"[All Fields] OR "chronically"[All Fields] OR "chronicities"[All Fields] OR "chronicity"[All Fields] OR "chronicization"[All Fields] OR "chronics"[All Fields]) AND ("Postsurgical"[All Fields] OR "postsurgically"[All Fields])) AND "Pains"[Title/Abstract]) OR "pain chronic postsurgical"[Title/Abstract] OR "postsurgical pain chronic"[Title/Abstract] OR "persistent postsurgical pain"[Title/Abstract] OR "pain persistent postsurgical"[Title/Abstract] OR (("Postsurgical"[All Fields] OR "postsurgically"[All Fields]) AND "pain persistent"[Title/Abstract]) OR "chronic post operative pain"[Title/Abstract] OR "chronic post operative pain"[Title/Abstract] OR "post operative pain chronic"[Title/Abstract] OR "pain chronic post operative"[Title/Abstract] OR "post operative pain chronic"[Title/Abstract] OR "chronic postoperative pain"[Title/Abstract] OR "chronic post surgical pain"[Title/Abstract] OR "chronic post surgical pain"[Title/Abstract] OR "pain chronic post surgical"[Title/Abstract] OR "post surgical pain chronic"[Title/Abstract] OR "analgaesia"[Title/Abstract] OR "analgesia"[Title/Abstract] OR "pain relief"[Title/Abstract] OR "post operation pain"[Title/Abstract] OR "postoperation pain"[Title/Abstract] OR "postsurgery pain"[Title/Abstract] OR "post surgery pain"[Title/Abstract] OR ((("sequential"[All Fields] OR "sequentially"[All Fields] OR "sequentials"[All Fields]) AND ("analgetic"[All Fields] OR "analgetics"[All Fields])) AND "analgesia"[Title/Abstract]) OR "surgical analgesia"[Title/Abstract])) | 2,179 | 23:02:32 |
| 14 | "pain management"[MeSH Major Topic] OR ("pain management"[Title/Abstract] OR "management pain"[Title/Abstract] OR (("manage"[All Fields] OR "managed"[All Fields] OR "management s"[All Fields] OR "Managements"[All Fields] OR "manager"[All Fields] OR "manager s"[All Fields] OR "managers"[All Fields] OR "manages"[All Fields] OR "managing"[All Fields] OR "managment"[All Fields] OR "organization and administration"[MeSH Terms] OR ("organization"[All Fields] AND "administration"[All Fields]) OR "organization and administration"[All Fields] OR "Management"[All Fields] OR "disease management"[MeSH Terms] OR ("disease"[All Fields] AND "Management"[All Fields]) OR "disease management"[All Fields]) AND "Pain"[Title/Abstract]) OR "pain managements"[Title/Abstract] OR "pain postoperative"[Title/Abstract] OR "postsurgical pain"[Title/Abstract] OR "pain postsurgical"[Title/Abstract] OR "post surgical pain"[Title/Abstract] OR "pain post surgical"[Title/Abstract] OR "post surgical pain"[Title/Abstract] OR "post operative pain"[Title/Abstract] OR "post operative pain"[Title/Abstract] OR "post operative pains"[Title/Abstract] OR "postoperative pain"[Title/Abstract] OR "pain post operative"[Title/Abstract] OR "pain post operative"[Title/Abstract] OR "postoperative pain acute"[Title/Abstract] OR "pain acute postoperative"[Title/Abstract] OR "post operative pain acute"[Title/Abstract] OR "pain acute post operative"[Title/Abstract] OR "post operative pain acute"[Title/Abstract] OR "acute postoperative pain"[Title/Abstract] OR "acute post operative pain"[Title/Abstract] OR "acute post operative pain"[Title/Abstract] OR "postoperative pain chronic"[Title/Abstract] OR "pain chronic postoperative"[Title/Abstract] OR "chronic postsurgical pain"[Title/Abstract] OR ((("Chronic"[All Fields] OR "chronical"[All Fields] OR "chronically"[All Fields] OR "chronicities"[All Fields] OR "chronicity"[All Fields] OR "chronicization"[All Fields] OR "chronics"[All Fields]) AND ("Postsurgical"[All Fields] OR "postsurgically"[All Fields])) AND "Pains"[Title/Abstract]) OR "pain chronic postsurgical"[Title/Abstract] OR "postsurgical pain chronic"[Title/Abstract] OR "persistent postsurgical pain"[Title/Abstract] OR "pain persistent postsurgical"[Title/Abstract] OR (("Postsurgical"[All Fields] OR "postsurgically"[All Fields]) AND "pain persistent"[Title/Abstract]) OR "chronic post operative pain"[Title/Abstract] OR "chronic post operative pain"[Title/Abstract] OR "post operative pain chronic"[Title/Abstract] OR "pain chronic post operative"[Title/Abstract] OR "post operative pain chronic"[Title/Abstract] OR "chronic postoperative pain"[Title/Abstract] OR "chronic post surgical pain"[Title/Abstract] OR "chronic post surgical pain"[Title/Abstract] OR "pain chronic post surgical"[Title/Abstract] OR "post surgical pain chronic"[Title/Abstract] OR "analgaesia"[Title/Abstract] OR "analgesia"[Title/Abstract] OR "pain relief"[Title/Abstract] OR "post operation pain"[Title/Abstract] OR "postoperation pain"[Title/Abstract] OR "postsurgery pain"[Title/Abstract] OR "post surgery pain"[Title/Abstract] OR ((("sequential"[All Fields] OR "sequentially"[All Fields] OR "sequentials"[All Fields]) AND ("analgetic"[All Fields] OR "analgetics"[All Fields])) AND "analgesia"[Title/Abstract]) OR "surgical analgesia"[Title/Abstract]) | 329,615 | Thu Jan 02 2025 23:01:34 |
| 13 | "randomized controlled trial"[Title/Abstract] OR "controlled clinical trial"[Title/Abstract] OR "randomized"[Title/Abstract] OR "randomised"[Title/Abstract] | 878,661 | Thu Jan 02 2025 22:55:33 |
| 6 | "pain management"[Title/Abstract] OR "management pain"[Title/Abstract] OR (("manage"[All Fields] OR "managed"[All Fields] OR "management s"[All Fields] OR "Managements"[All Fields] OR "manager"[All Fields] OR "manager s"[All Fields] OR "managers"[All Fields] OR "manages"[All Fields] OR "managing"[All Fields] OR "managment"[All Fields] OR "organization and administration"[MeSH Terms] OR ("organization"[All Fields] AND "administration"[All Fields]) OR "organization and administration"[All Fields] OR "Management"[All Fields] OR "disease management"[MeSH Terms] OR ("disease"[All Fields] AND "Management"[All Fields]) OR "disease management"[All Fields]) AND "Pain"[Title/Abstract]) OR "pain managements"[Title/Abstract] OR "pain postoperative"[Title/Abstract] OR "postsurgical pain"[Title/Abstract] OR "pain postsurgical"[Title/Abstract] OR "post surgical pain"[Title/Abstract] OR "pain post surgical"[Title/Abstract] OR "post surgical pain"[Title/Abstract] OR "post operative pain"[Title/Abstract] OR "post operative pain"[Title/Abstract] OR "post operative pains"[Title/Abstract] OR "postoperative pain"[Title/Abstract] OR "pain post operative"[Title/Abstract] OR "pain post operative"[Title/Abstract] OR "postoperative pain acute"[Title/Abstract] OR "pain acute postoperative"[Title/Abstract] OR "post operative pain acute"[Title/Abstract] OR "pain acute post operative"[Title/Abstract] OR "post operative pain acute"[Title/Abstract] OR "acute postoperative pain"[Title/Abstract] OR "acute post operative pain"[Title/Abstract] OR "acute post operative pain"[Title/Abstract] OR "postoperative pain chronic"[Title/Abstract] OR "pain chronic postoperative"[Title/Abstract] OR "chronic postsurgical pain"[Title/Abstract] OR ((("Chronic"[All Fields] OR "chronical"[All Fields] OR "chronically"[All Fields] OR "chronicities"[All Fields] OR "chronicity"[All Fields] OR "chronicization"[All Fields] OR "chronics"[All Fields]) AND ("Postsurgical"[All Fields] OR "postsurgically"[All Fields])) AND "Pains"[Title/Abstract]) OR "pain chronic postsurgical"[Title/Abstract] OR "postsurgical pain chronic"[Title/Abstract] OR "persistent postsurgical pain"[Title/Abstract] OR "pain persistent postsurgical"[Title/Abstract] OR (("Postsurgical"[All Fields] OR "postsurgically"[All Fields]) AND "pain persistent"[Title/Abstract]) OR "chronic post operative pain"[Title/Abstract] OR "chronic post operative pain"[Title/Abstract] OR "post operative pain chronic"[Title/Abstract] OR "pain chronic post operative"[Title/Abstract] OR "post operative pain chronic"[Title/Abstract] OR "chronic postoperative pain"[Title/Abstract] OR "chronic post surgical pain"[Title/Abstract] OR "chronic post surgical pain"[Title/Abstract] OR "pain chronic post surgical"[Title/Abstract] OR "post surgical pain chronic"[Title/Abstract] OR "analgaesia"[Title/Abstract] OR "analgesia"[Title/Abstract] OR "pain relief"[Title/Abstract] OR "post operation pain"[Title/Abstract] OR "postoperation pain"[Title/Abstract] OR "postsurgery pain"[Title/Abstract] OR "post surgery pain"[Title/Abstract] OR ((("sequential"[All Fields] OR "sequentially"[All Fields] OR "sequentials"[All Fields]) AND ("analgetic"[All Fields] OR "analgetics"[All Fields])) AND "analgesia"[Title/Abstract]) OR "surgical analgesia"[Title/Abstract] | 327,689 | Thu Jan 02 2025 22:39:54 |
| 5 | "pain management"[MeSH Major Topic] | 25,674 | Thu Jan 02 2025 22:37:53 |
| 4 | "cholecystectomy laparoscopic"[Title/Abstract] OR (("Cholecystectomy"[MeSH Terms] OR "Cholecystectomy"[All Fields] OR "Cholecystectomies"[All Fields]) AND "Celioscopic"[Title/Abstract]) OR "celioscopic cholecystectomies"[Title/Abstract] OR "celioscopic cholecystectomy"[Title/Abstract] OR (("Cholecystectomy"[MeSH Terms] OR "Cholecystectomy"[All Fields] OR "Cholecystectomies"[All Fields]) AND "Celioscopic"[Title/Abstract]) OR "laparoscopic cholecystectomy"[Title/Abstract] OR "cholecystectomies laparoscopic"[Title/Abstract] OR "laparoscopic cholecystectomies"[Title/Abstract] OR "laparoscopic gallbladder resection"[Title/Abstract] OR "cholecystectomy, laparoscopic"[MeSH Major Topic] | 18,590 | Thu Jan 02 2025 22:37:26 |
| 3 | "cholecystectomy, laparoscopic"[MeSH Major Topic] | 11,633 | Thu Jan 02 2025 22:36:52 |
| 2 | "cholecystectomy laparoscopic"[Title/Abstract] OR (("Cholecystectomy"[MeSH Terms] OR "Cholecystectomy"[All Fields] OR "Cholecystectomies"[All Fields]) AND "Celioscopic"[Title/Abstract]) OR "celioscopic cholecystectomies"[Title/Abstract] OR "celioscopic cholecystectomy"[Title/Abstract] OR (("Cholecystectomy"[MeSH Terms] OR "Cholecystectomy"[All Fields] OR "Cholecystectomies"[All Fields]) AND "Celioscopic"[Title/Abstract]) OR "laparoscopic cholecystectomy"[Title/Abstract] OR "cholecystectomies laparoscopic"[Title/Abstract] OR "laparoscopic cholecystectomies"[Title/Abstract] OR "laparoscopic gallbladder resection"[Title/Abstract] | 16,616 | Thu Jan 02 2025 22:36:09 |

Table S3 Summary of Extracted Data on Adjunctive Analgesic Therapy

| Author, year | Characteristics | Intervention Group | Sample Size | Control Group | Sample Size |
| --- | --- | --- | --- | --- | --- |
| Nechay, 2021 | Paracetamol Opioids | 8 (18.2), 3 (6.8) | 44 | 1 (2.3), 4 (9.1) | 44 |
| Graversen, 2013 | Routine drug therapy | NA |  | NA |  |
| Kheradkish, 2024 | pethidine | 35.12 ± 12.42 | 42 | 35.89 ± 12.56 | 39 |
| Artıklar, 2023 | Paracetamol (Mg), Diclofenac sodium (Mg), Opioid | 1428.57 ± 503.95, 97.82 ± 35.28, 32 (77.8), 0 | 35 | 1500.00 ± 514.50, 118.26 ± 37.78, 100.00 ± 0.00 | 35 |
|
|
| Abbasnia, 2023 | Routine drug therapy | NA | 49 | NA | 47 |
| Saremirad, 2022 | Apotel, Diclofenac sodium (suppository) | 37 (94.9), 4 (5.10) | 42 | 37 (94.9), 10 (22.2) | 41 |
|
| Mottahedi, 2023 | Routine drug therapy | NA | 46 | NA | 46 |
| Fengxiao Wang, 2023 | parecoxib sodium | 3 (14.29) | 21 | 10 (47.62) | 21 |
| Koras, 2018 | nonsteroidal anti-inflammatory | 24 (28.2) | 85 | 75 (91.5) | 82 |
| Zohourparvaz, 2023 | Analgesic use | 25 (75.8) | 33 | 33 (94.28) | 33 |

Table S4 Pairwise comparison results for pain outcomes

| Routine Nursing | -1.1 (-3.1, 0.92) | -1.99 (-4.28, 0.3) | 0.04 (-1.53, 1.63) | 0.83 (-1.37, 3.02) | -1.98 (-3.12, -0.89) | -1.19 (-2.71, 0.32) | 0 (-2.22, 2.25) | -1.04 (-2.05, -0.03) | -2.42 (-4.67, -0.19) | -0.84 (-3.07, 1.39) | -2.59 (-4.93, -0.27) | -3.61 (-5.71, -1.5) | -0.67 (-2.92, 1.55) | -0.56 (-2.8, 1.66) |
| --- | --- | --- | --- | --- | --- | --- | --- | --- | --- | --- | --- | --- | --- | --- |
| 1.1 (-0.92, 3.1) | Reiki | -0.88 (-3.97, 2.17) | 1.15 (-1.41, 3.7) | 1.93 (-1.07, 4.91) | -0.88 (-3.21, 1.4) | -0.08 (-2.63, 2.42) | 1.1 (-1.94, 4.12) | 0.06 (-1.99, 2.07) | -1.32 (-4.35, 1.68) | 0.26 (-2.77, 3.27) | -1.49 (-4.59, 1.56) | -2.51 (-5.34, 0.34) | 0.43 (-2.59, 3.42) | 0.54 (-2.47, 3.54) |
| 1.99 (-0.3, 4.28) | 0.88 (-2.17, 3.97) | Acupuncture | 2.03 (-0.77, 4.82) | 2.8 (-0.37, 6.01) | 0 (-2.58, 2.54) | 0.79 (-1.95, 3.54) | 1.98 (-1.21, 5.19) | 0.94 (-1.55, 3.46) | -0.44 (-3.64, 2.78) | 1.14 (-2.04, 4.34) | -0.61 (-3.86, 2.64) | -1.62 (-4.71, 1.5) | 1.31 (-1.9, 4.51) | 1.43 (-1.78, 4.63) |
| -0.04 (-1.63, 1.53) | -1.15 (-3.7, 1.41) | -2.03 (-4.82, 0.77) | Health Education | 0.78 (-1.9, 3.49) | -2.03 (-3.99, -0.12) | -1.23 (-3.46, 0.94) | -0.04 (-2.77, 2.71) | -1.08 (-2.97, 0.79) | -2.46 (-5.22, 0.3) | -0.88 (-3.62, 1.83) | -2.63 (-5.45, 0.14) | -3.65 (-6.26, -0.99) | -0.71 (-3.47, 2.02) | -0.6 (-3.34, 2.14) |
| -0.83 (-3.02, 1.37) | -1.93 (-4.91, 1.07) | -2.8 (-6.01, 0.37) | -0.78 (-3.49, 1.9) | ERAS | -2.81 (-5.31, -0.37) | -2.02 (-4.7, 0.65) | -0.83 (-3.95, 2.32) | -1.87 (-4.28, 0.55) | -3.24 (-6.38, -0.11) | -1.66 (-4.8, 1.44) | -3.42 (-6.61, -0.22) | -4.44 (-7.45, -1.36) | -1.49 (-4.67, 1.62) | -1.38 (-4.55, 1.75) |
| 1.98 (0.89, 3.12) | 0.88 (-1.4, 3.21) | 0 (-2.54, 2.58) | 2.03 (0.12, 3.99) | 2.81 (0.37, 5.31) | Massage | 0.79 (-0.88, 2.5) | 1.98 (-0.48, 4.52) | 0.94 (-0.53, 2.47) | -0.43 (-2.92, 2.07) | 1.14 (-1.33, 3.64) | -0.61 (-3.16, 1.98) | -1.63 (-3.98, 0.78) | 1.31 (-1.16, 3.81) | 1.42 (-1.04, 3.94) |
| 1.19 (-0.32, 2.71) | 0.08 (-2.42, 2.63) | -0.79 (-3.54, 1.95) | 1.23 (-0.94, 3.46) | 2.02 (-0.65, 4.7) | -0.79 (-2.5, 0.88) | TENS | 1.18 (-1.48, 3.9) | 0.15 (-1.66, 1.97) | -1.23 (-3.93, 1.46) | 0.34 (-2.33, 3.04) | -1.41 (-4.18, 1.36) | -2.42 (-4.99, 0.2) | 0.52 (-2.17, 3.21) | 0.63 (-2.05, 3.32) |
| 0 (-2.25, 2.22) | -1.1 (-4.12, 1.94) | -1.98 (-5.19, 1.21) | 0.04 (-2.71, 2.77) | 0.83 (-2.32, 3.95) | -1.98 (-4.52, 0.48) | -1.18 (-3.9, 1.48) | Music | -1.04 (-3.51, 1.39) | -2.42 (-5.62, 0.72) | -0.84 (-4.03, 2.31) | -2.59 (-5.81, 0.63) | -3.61 (-6.65, -0.57) | -0.67 (-3.84, 2.45) | -0.56 (-3.75, 2.57) |
| 1.04 (0.03, 2.05) | -0.06 (-2.07, 1.99) | -0.94 (-3.46, 1.55) | 1.08 (-0.79, 2.97) | 1.87 (-0.55, 4.28) | -0.94 (-2.47, 0.53) | -0.15 (-1.97, 1.66) | 1.04 (-1.39, 3.51) | Acupressure | -1.38 (-3.85, 1.07) | 0.2 (-2.24, 2.65) | -1.55 (-4.09, 0.98) | -2.57 (-4.66, -0.47) | 0.37 (-2.12, 2.84) | 0.48 (-1.98, 2.94) |
| 2.42 (0.19, 4.67) | 1.32 (-1.68, 4.35) | 0.44 (-2.78, 3.64) | 2.46 (-0.3, 5.22) | 3.24 (0.11, 6.38) | 0.43 (-2.07, 2.92) | 1.23 (-1.46, 3.93) | 2.42 (-0.72, 5.62) | 1.38 (-1.07, 3.85) | Footbath | 1.58 (-1.56, 4.72) | -0.18 (-3.41, 3.07) | -1.19 (-4.28, 1.89) | 1.75 (-1.44, 4.89) | 1.86 (-1.32, 5.02) |
| 0.84 (-1.39, 3.07) | -0.26 (-3.27, 2.77) | -1.14 (-4.34, 2.04) | 0.88 (-1.83, 3.62) | 1.66 (-1.44, 4.8) | -1.14 (-3.64, 1.33) | -0.34 (-3.04, 2.33) | 0.84 (-2.31, 4.03) | -0.2 (-2.65, 2.24) | -1.58 (-4.72, 1.56) | Breathing Exercises | -1.75 (-4.99, 1.48) | -2.77 (-5.8, 0.32) | 0.17 (-3.01, 3.3) | 0.29 (-2.87, 3.45) |
| 2.59 (0.27, 4.93) | 1.49 (-1.56, 4.59) | 0.61 (-2.64, 3.86) | 2.63 (-0.14, 5.45) | 3.42 (0.22, 6.61) | 0.61 (-1.98, 3.16) | 1.41 (-1.36, 4.18) | 2.59 (-0.63, 5.81) | 1.55 (-0.98, 4.09) | 0.18 (-3.07, 3.41) | 1.75 (-1.48, 4.99) | Essential Oil | -1.02 (-4.14, 2.16) | 1.92 (-1.3, 5.11) | 2.03 (-1.18, 5.27) |
| 3.61 (1.5, 5.71) | 2.51 (-0.34, 5.34) | 1.62 (-1.5, 4.71) | 3.65 (0.99, 6.26) | 4.44 (1.36, 7.45) | 1.63 (-0.78, 3.98) | 2.42 (-0.2, 4.99) | 3.61 (0.57, 6.65) | 2.57 (0.47, 4.66) | 1.19 (-1.89, 4.28) | 2.77 (-0.32, 5.8) | 1.02 (-2.16, 4.14) | Ear Acupressure | 2.94 (-0.16, 6) | 3.05 (-0.01, 6.1) |
| 0.67 (-1.55, 2.92) | -0.43 (-3.42, 2.59) | -1.31 (-4.51, 1.9) | 0.71 (-2.02, 3.47) | 1.49 (-1.62, 4.67) | -1.31 (-3.81, 1.16) | -0.52 (-3.21, 2.17) | 0.67 (-2.45, 3.84) | -0.37 (-2.84, 2.12) | -1.75 (-4.89, 1.44) | -0.17 (-3.3, 3.01) | -1.92 (-5.11, 1.3) | -2.94 (-6, 0.16) | Breathing + Coughing Exercise | 0.11 (-2.16, 2.38) |
| 0.56 (-1.66, 2.8) | -0.54 (-3.54, 2.47) | -1.43 (-4.63, 1.78) | 0.6 (-2.14, 3.34) | 1.38 (-1.75, 4.55) | -1.42 (-3.94, 1.04) | -0.63 (-3.32, 2.05) | 0.56 (-2.57, 3.75) | -0.48 (-2.94, 1.98) | -1.86 (-5.02, 1.32) | -0.29 (-3.45, 2.87) | -2.03 (-5.27, 1.18) | -3.05 (-6.1, 0.01) | -0.11 (-2.38, 2.16) | Breathing + Coughing Exercise + Oxygen Therapy |

Table S5 Pairwise comparison results for anxiety outcomes

| Routine Nursing | -0.15 (-22.59, 22.08) | -5.14 (-16.22, 6.03) | -3.19 (-25.29, 19.04) | -1.48 (-23.93, 20.75) |
| --- | --- | --- | --- | --- |
| 0.15 (-22.08, 22.59) | Acupressure | -4.99 (-30.1, 20.14) | -3.03 (-34.8, 28.58) | -1.33 (-33, 30.62) |
| 5.14 (-6.03, 16.22) | 4.99 (-20.14, 30.1) | Health Education | 1.95 (-22.67, 26.79) | 3.66 (-21.22, 28.56) |
| 3.19 (-19.04, 25.29) | 3.03 (-28.58, 34.8) | -1.95 (-26.79, 22.67) | Massage | 1.7 (-29.71, 33.23) |
| 1.48 (-20.75, 23.93) | 1.33 (-30.62, 33) | -3.66 (-28.56, 21.22) | -1.7 (-33.23, 29.71) | Footbath |


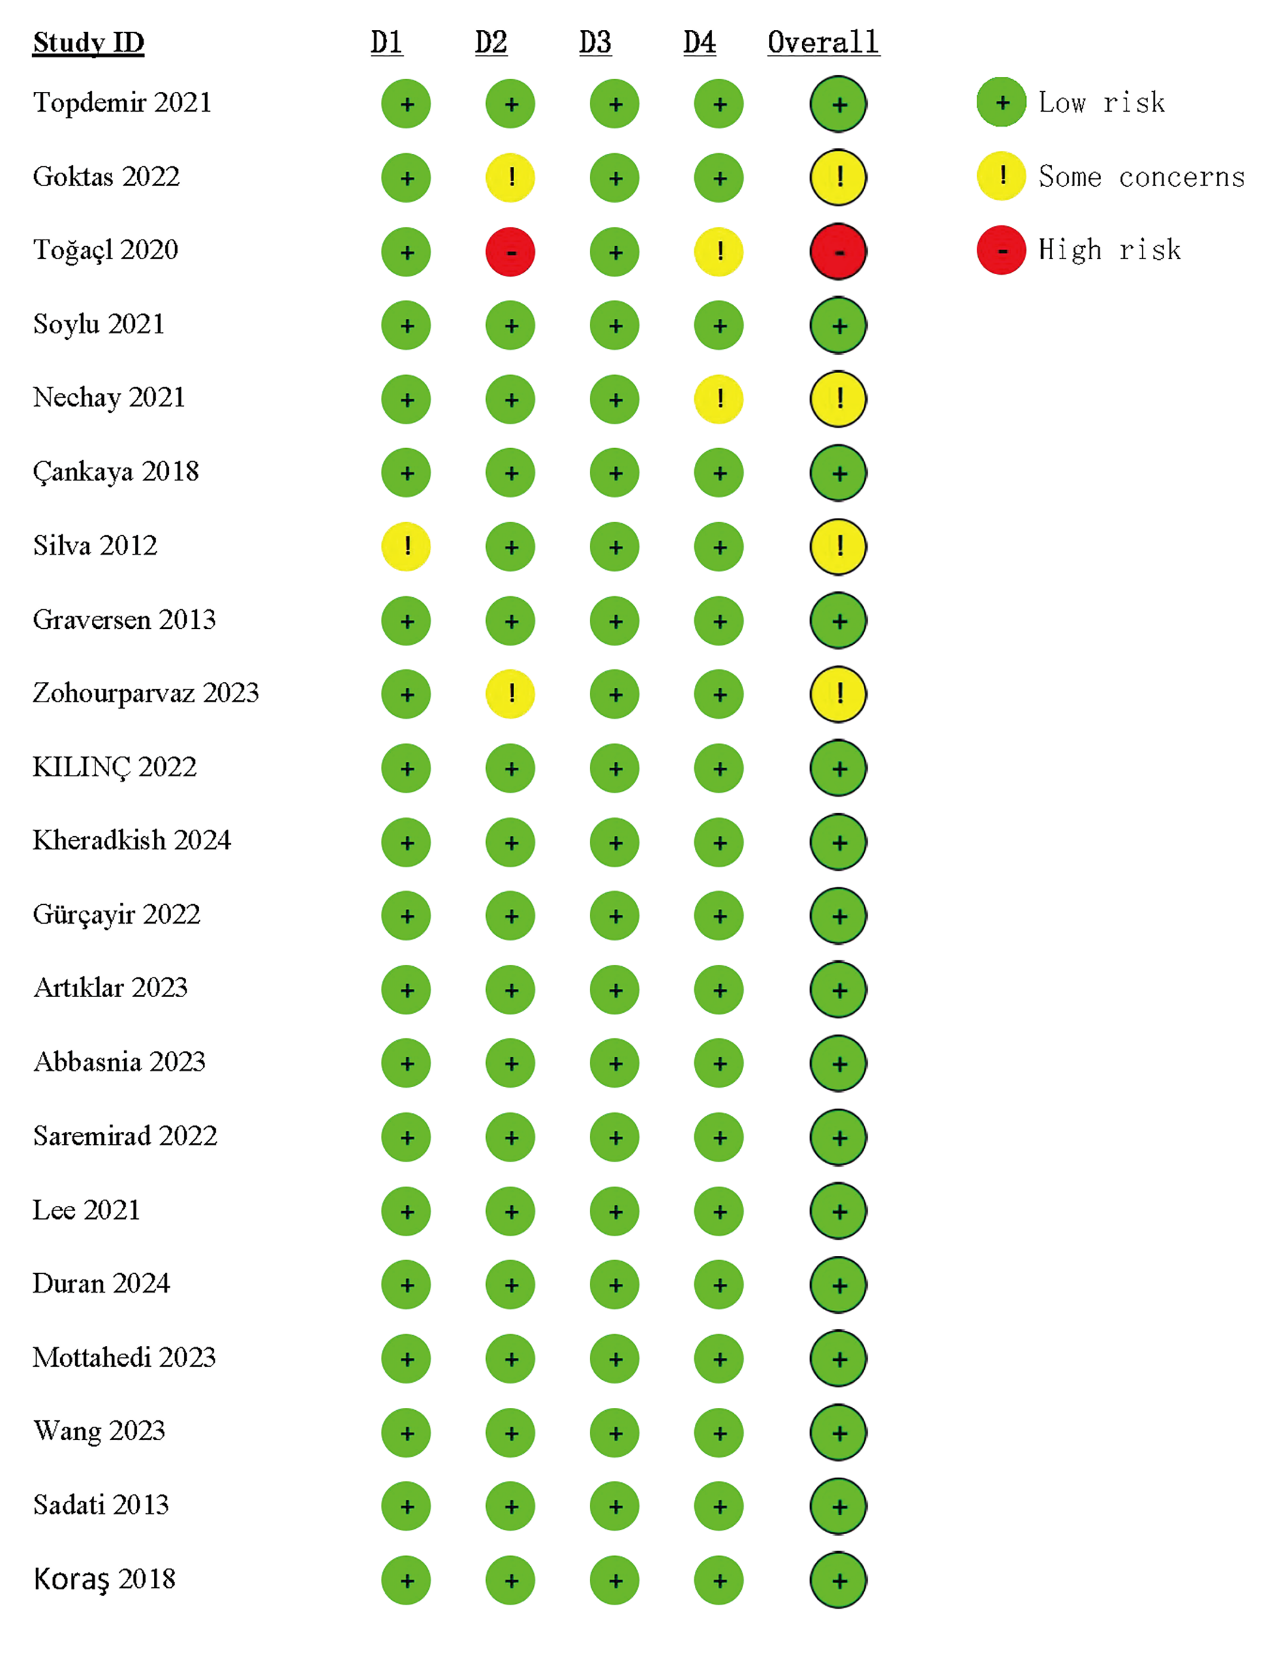


Figure S1 Risk of bias assessment results


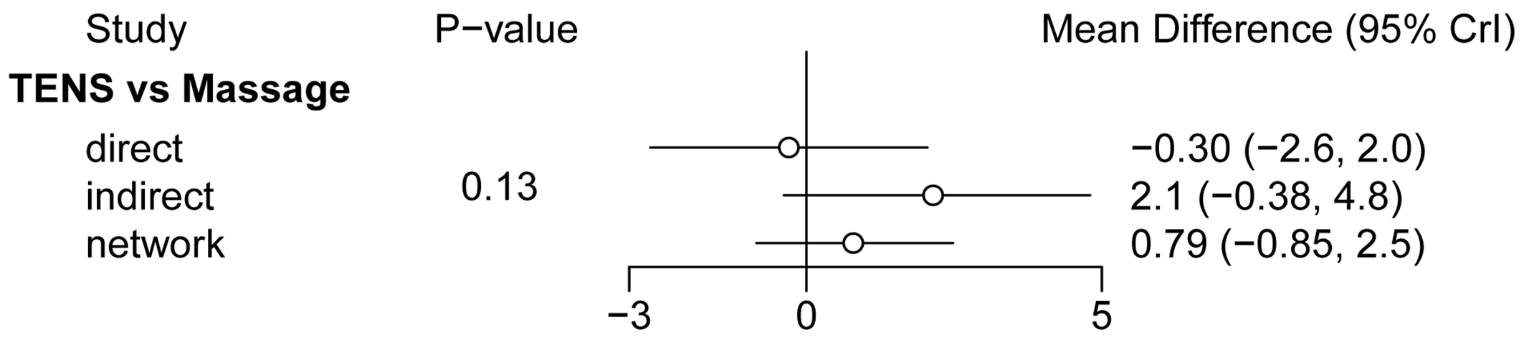


Figure S2 Assessment of inconsistency. Note: TENS: Transcutaneous Electrical Nerve Stimulation; Crl: Credible Interval; *P*=0.13
